# Supplementary material for: Using Body Composition Groups to Identify Children and Adolescents at Risk of Dyslipidemia
Source: MDPI journal article supplement (doi:10.3390/children8111047), 2021-11-13
Supplement: s1 [file children-1424214-supplementary.pdf › children-1424214-supplementary.pdf]

## Supplemental Material

**Table S1. Sample size and prevalence of body composition groups in different age groups**

| <b>both sexes</b> | <b>6-&lt;10<br/>years<br/>%</b> | <b>10-&lt;14<br/>years<br/>%</b> | <b>14-&lt;18<br/>years<br/>%</b> |
|-------------------|---------------------------------|----------------------------------|----------------------------------|
| normal ALMI-FMI   | 71.5%                           | 72.9%                            | 69.5%                            |
| low ALMI-FMI      | 9.4%                            | 11.5%                            | 11.1%                            |
| high ALMI-FMI     | 11.7%                           | 12.0%                            | 11.3%                            |
| low ALMI-high FMI | 3.0%                            | 1.3%                             | 2.9%                             |
| high ALMI-low FMI | 4.4%                            | 2.3%                             | 5.2%                             |
| <b>males</b>      |                                 |                                  |                                  |
| normal ALMI-FMI   | 70.1%                           | 75.3%                            | 71.0%                            |
| low ALMI-FMI      | 9.4%                            | 10.2%                            | 9.5%                             |
| high ALMI-FMI     | 11.0%                           | 10.2%                            | 10.4%                            |
| low ALMI-high FMI | 3.6%                            | 0.9%                             | 3.6%                             |
| high ALMI-low FMI | 5.8%                            | 3.3%                             | 5.4%                             |
| <b>females</b>    |                                 |                                  |                                  |
| normal ALMI-FMI   | 72.9%                           | 69.9%                            | 67.7%                            |
| low ALMI-FMI      | 9.4%                            | 13.1%                            | 12.9%                            |
| high ALMI-FMI     | 12.5%                           | 14.2%                            | 12.4%                            |
| low ALMI-high FMI | 2.4%                            | 1.7%                             | 2.2%                             |
| high ALMI-low FMI | 2.8%                            | 1.1%                             | 4.8%                             |

### Legend

Table shows sample size (n) in age groups of 4-years.

**Table S2. Prevalence of altered levels of serum lipids in body composition groups**

| <b>parameter</b>                                        | <b>normal<br/>ALMI<br/>FMI</b> | <b>low<br/>ALMI<br/>FMI</b> | <b>high<br/>ALMI<br/>FMI</b> | <b>low<br/>ALMI<br/>high<br/>FMI</b> | <b>high<br/>ALMI<br/>low FMI</b> |
|---------------------------------------------------------|--------------------------------|-----------------------------|------------------------------|--------------------------------------|----------------------------------|
| HDL-c <40mg/dl                                          | 4.1%                           | 5.5%                        | 9.2%                         | 8.6%                                 | 3.6%                             |
| HDL-c z-scores $\leq 5^{\text{th}}$ percentile          | 4.7%                           | 4.1%                        | 11.7%                        | 8.6%                                 | 0.0%                             |
| LDL-c $\geq 130$ mg/dl                                  | 4.8%                           | 6.2%                        | 8.6%                         | 5.7%                                 | 0.0%                             |
| LDL-c z-scores $\geq 95^{\text{th}}$ percentile         | 4.2%                           | 4.8%                        | 7.4%                         | 5.7%                                 | 1.8%                             |
| triglycerides $\geq 100/\geq 130$ mg/dl                 | 9.7%                           | 6.2%                        | 17.8%                        | 8.6%                                 | 7.1%                             |
| triglycerides z-scores $\geq 95^{\text{th}}$ percentile | 4.8%                           | 4.8%                        | 14.1%                        | 2.9%                                 | 3.6%                             |

**Legend**

Table shows the prevalence of elevated (for HDL-c decreased, respectively) serum lipid levels in different body composition groups.
